# Supplementary material for: Differential Drug Survival of Second-Line Biologic Therapies in Patients with Psoriasis: Observational Cohort Study from the British Association of Dermatologists Biologic Interventions Register (BADBIR)
Source: PubMed Central journal article supplement (PMC5869053; doi:10.1016/j.jid.2017.09.044), 2018-04
Supplement: mmc1.pdf [file mmc1.pdf]

## Supplementary Material

**Table S1: Patterns of biologic therapies switches**

| First biologic therapy                            | Second biologic therapy |                  |                    |
|---------------------------------------------------|-------------------------|------------------|--------------------|
|                                                   | Adalimumab              | Etanercept       | Ustekinumab        |
| <b><u>TNF Inhibitors</u></b> ( <i>n</i> = 1181)   | <b>492 (41.7%)</b>      | <b>94 (7.9%)</b> | <b>595 (50.4%)</b> |
| Adalimumab                                        | NA                      | 88 (17.0%)       | 429 (83.0%)        |
| Etanercept                                        | 473 (77.5%)             | NA               | 137 (22.5%)        |
| Infliximab                                        | 19 (35.2%)              | 6 (11.1%)        | 29 (53.7%)         |
| <b><u>IL-12/23 Inhibitor</u></b> ( <i>n</i> = 47) |                         |                  |                    |
| Ustekinumab                                       | 42 (89.4%)              | 5 (10.6%)        | NA                 |
| <b><u>Other Biologics</u></b> * ( <i>n</i> = 11)  | <5                      | 5 (45.5%)        | <5                 |

\* Includes efalizumab and clinical trial biologic

**Table S2: Patterns of biologic therapies switches, based on the reason for discontinuation of the first biologic therapy**

| <b>Reason for discontinuing 1<sup>st</sup> biologic therapy</b>              | <b>Second biologic therapy</b> |            |             |
|------------------------------------------------------------------------------|--------------------------------|------------|-------------|
|                                                                              | Adalimumab                     | Etanercept | Ustekinumab |
| Total no. of patients on 2 <sup>nd</sup> biologic therapy ( <i>n</i> = 1239) | 538 (43.4%)                    | 104 (8.4%) | 597 (48.2%) |
| Ineffectiveness ( <i>n</i> = 941)                                            | 433 (46.0%)                    | 67 (7.1%)  | 441 (46.9%) |
| AEs ( <i>n</i> = 154)                                                        | 46 (29.9%)                     | 20 (13.0%) | 88 (57.1%)  |
| Other ( <i>n</i> = 144)                                                      | 59 (41.0%)                     | 17 (11.8%) | 68 (47.2%)  |

**Table S3: The overall and differential second-line biologic survival functions among patients who switched from TNF inhibitors, stratified by reason for 2<sup>nd</sup> biologic drug discontinuation, at years 1, 2 and 3**

| <b>Reasons for drug discontinuation</b> | <b>Second Biologic<br/>(n = 1181)</b> | <b>Adalimumab<br/>(n = 492)</b> | <b>Etanercept<br/>(n = 94)</b> | <b>Ustekinumab<br/>(n = 595)</b> |
|-----------------------------------------|---------------------------------------|---------------------------------|--------------------------------|----------------------------------|
| <i>All reasons</i>                      |                                       |                                 |                                |                                  |
| Year 1                                  | 0.78 [0.75 - 0.80]                    | 0.75 [0.71 - 0.79]              | 0.46 [0.36 - 0.56]             | 0.85 [0.81 - 0.87]               |
| Year 2                                  | 0.66 [0.63 - 0.69]                    | 0.60 [0.55 - 0.64]              | 0.35 [0.25 - 0.45]             | 0.77 [0.72 - 0.80]               |
| Year 3                                  | 0.59 [0.56 - 0.63]                    | 0.51 [0.46 - 0.56]              | 0.33 [0.22 - 0.43]             | 0.73 [0.68 - 0.77]               |
| <i>Ineffectiveness</i>                  |                                       |                                 |                                |                                  |
| Year 1                                  | 0.86 [0.84 - 0.86]                    | 0.85 [0.81 - 0.88]              | 0.56 [0.44 - 0.66]             | 0.91 [0.88 - 0.93]               |
| Year 2                                  | 0.78 [0.76 - 0.81]                    | 0.75 [0.70 - 0.79]              | 0.43 [0.31 - 0.55]             | 0.87 [0.84 - 0.90]               |
| Year 3                                  | 0.76 [0.73 - 0.78]                    | 0.71 [0.66 - 0.75]              | 0.43 [0.31 - 0.55]             | 0.85 [0.81 - 0.88]               |
| <i>Adverse events</i>                   |                                       |                                 |                                |                                  |
| Year 1                                  | 0.95 [0.94 - 0.96]                    | 0.94 [0.92 - 0.96]              | 0.87 [0.78 - 0.93]             | 0.97 [0.95 - 0.98]               |
| Year 2                                  | 0.93 [0.91 - 0.94]                    | 0.92 [0.88 - 0.94]              | 0.87 [0.78 - 0.93]             | 0.95 [0.92 - 0.97]               |
| Year 3                                  | 0.90 [0.87 - 0.92]                    | 0.86 [0.82 - 0.90]              | 0.81 [0.63 - 0.91]             | 0.94 [0.92 - 0.96]               |

Data presented as mean (95% confidence interval).

**Table S4: The overall and differential second-line biologic survival functions among patients who switched from etanercept, stratified by reason for 2<sup>nd</sup> biologic drug discontinuation, at years 1, 2 and 3**

| <b>Reasons for drug discontinuation</b> | <b>Second Biologic<br/>(n = 610)</b> | <b>Adalimumab<br/>(n = 473)</b> | <b>Ustekinumab<br/>(n = 137)</b> |
|-----------------------------------------|--------------------------------------|---------------------------------|----------------------------------|
| <i>All reasons</i>                      |                                      |                                 |                                  |
| Year 1                                  | 0.78 [0.74 - 0.81]                   | 0.75 [0.71 - 0.79]              | 0.87 [0.80 - 0.92]               |
| Year 2                                  | 0.63 [0.59 - 0.67]                   | 0.60 [0.55 - 0.64]              | 0.77 [0.68 - 0.83]               |
| Year 3                                  | 0.55 [0.51 - 0.60]                   | 0.51 [0.46 - 0.56]              | 0.71 [0.60 - 0.79]               |
| <i>Ineffectiveness</i>                  |                                      |                                 |                                  |
| Year 1                                  | 0.87 [0.84 - 0.90]                   | 0.85 [0.81 - 0.88]              | 0.95 [0.89 - 0.97]               |
| Year 2                                  | 0.78 [0.74 - 0.82]                   | 0.75 [0.70 - 0.79]              | 0.89 [0.81 - 0.94]               |
| Year 3                                  | 0.74 [0.70 - 0.78]                   | 0.71 [0.66 - 0.76]              | 0.84 [0.74 - 0.90]               |
| <i>Adverse events</i>                   |                                      |                                 |                                  |
| Year 1                                  | 0.94 [0.93 - 0.96]                   | 0.94 [0.91 - 0.96]              | 0.98 [0.93 - 0.99]               |
| Year 2                                  | 0.92 [0.89 - 0.94]                   | 0.91 [0.88 - 0.94]              | 0.94 [0.87 - 0.97]               |
| Year 3                                  | 0.88 [0.84 - 0.91]                   | 0.86 [0.82 - 0.90]              | 0.94 [0.87 - 0.97]               |

Data presented as mean (95% confidence interval).

**Table S5: The overall and differential second-line biologic survival functions among patients who switched from adalimumab, stratified by reason for 2<sup>nd</sup> biologic drug discontinuation, at years 1, 2 and 3**

| <b>Reasons for drug discontinuation</b> | <b>Second Biologic<br/>(n = 517)</b> | <b>Etanercept<br/>(n = 88)</b> | <b>Ustekinumab<br/>(n = 429)</b> |
|-----------------------------------------|--------------------------------------|--------------------------------|----------------------------------|
| <i>All reasons</i>                      |                                      |                                |                                  |
| Year 1                                  | 0.77 [0.73 - 0.81]                   | 0.48 [0.38 - 0.58]             | 0.83 [0.79 - 0.87]               |
| Year 2                                  | 0.70 [0.65 - 0.74]                   | 0.36 [0.26 - 0.47]             | 0.77 [0.72 - 0.81]               |
| Year 3                                  | 0.67 [0.62 - 0.71]                   | 0.33 [0.22 - 0.45]             | 0.74 [0.69 - 0.78]               |
| <i>Ineffectiveness</i>                  |                                      |                                |                                  |
| Year 1                                  | 0.85 [0.81 - 0.88]                   | 0.58 [0.46 - 0.68]             | 0.90 [0.87 - 0.93]               |
| Year 2                                  | 0.80 [0.75 - 0.83]                   | 0.45 [0.32 - 0.56]             | 0.87 [0.83 - 0.90]               |
| Year 3                                  | 0.79 [0.75 - 0.83]                   | 0.45 [0.32 - 0.56]             | 0.86 [0.82 - 0.89]               |
| <i>Adverse events</i>                   |                                      |                                |                                  |
| Year 1                                  | 0.95 [0.93 - 0.97]                   | 0.88 [0.78 - 0.94]             | 0.97 [0.94 - 0.98]               |
| Year 2                                  | 0.94 [0.91 - 0.96]                   | 0.88 [0.78 - 0.94]             | 0.95 [0.92 - 0.97]               |
| Year 3                                  | 0.93 [0.89 - 0.95]                   | 0.81 [0.61 - 0.92]             | 0.94 [0.91 - 0.97]               |

Data presented as mean (95% confidence interval).

---

**Table S6: Missing data**

---

| <b>Variable</b>     | <b>Number of patients with missing data</b> | <b>Percentage of missing data</b> |
|---------------------|---------------------------------------------|-----------------------------------|
| Smoking status*     | 261                                         | 21.1%                             |
| Obesity category**  | 786                                         | 63.4%                             |
| PASI**              | 441                                         | 35.6%                             |
| DLQI**              | 797                                         | 64.3%                             |
| Disease duration*** | 11                                          | 0.9%                              |

---

\* at time of registration into BADBIR

\*\* dated within 3 months prior to switching to 2<sup>nd</sup> biologic therapy

\*\*\* at time of switching to the 2<sup>nd</sup> biologic therapy

---

**Figure S1: Crude drug survival of the second biologic course limited to discontinuation of the second biologic due to ineffectiveness or adverse events (AEs).**

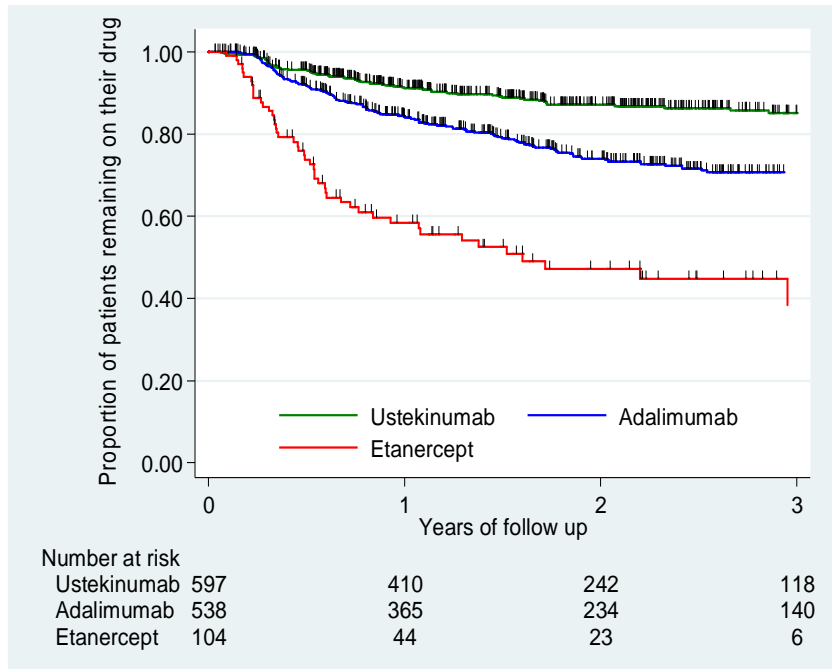

(a) Crude drug survival of the second biologic course limited to discontinuation of the second biologic due to ineffectiveness.

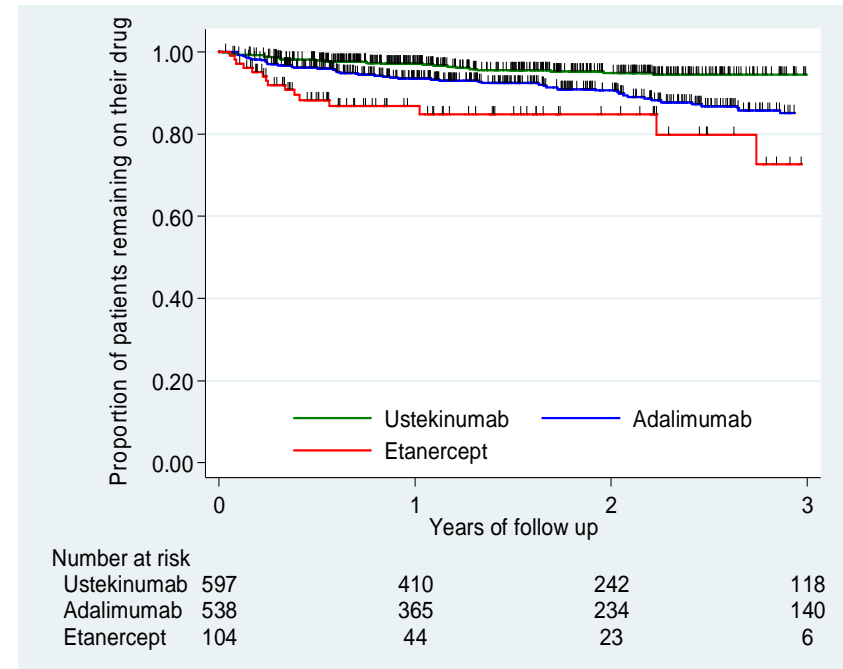

(b) Crude drug survival of the second biologic course limited to discontinuation of the second biologic due to AEs.

**Figure S2: Crude drug survival of the second biologic course limited to patients discontinuing first-line etanercept or adalimumab.**

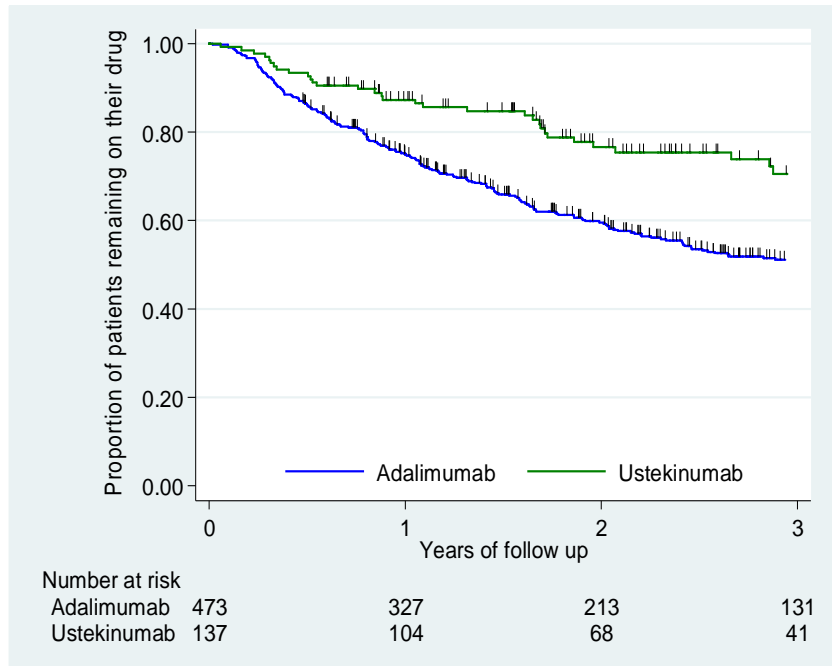

(a) Patients discontinuing first-line etanercept who were switched to second-line adalimumab or ustekinumab

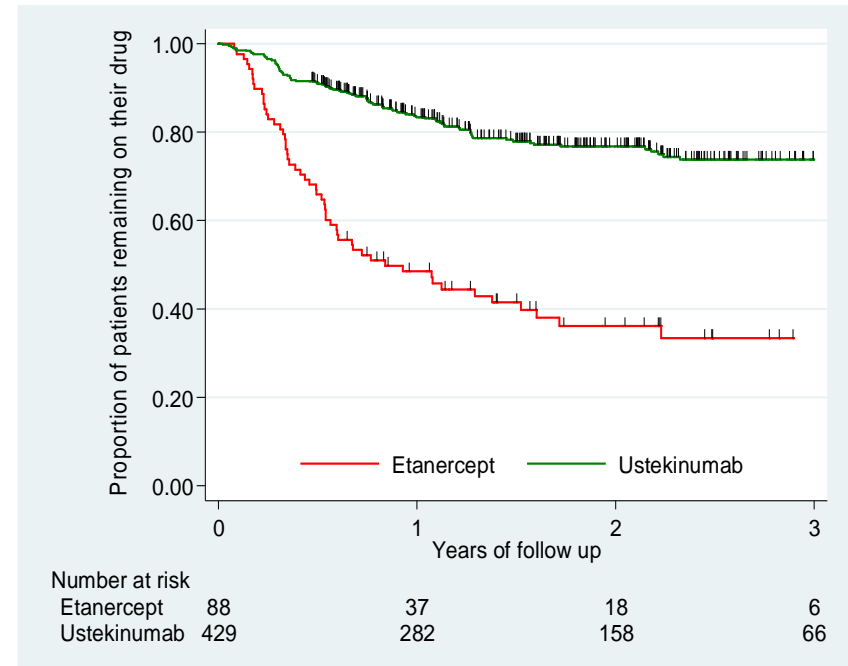

(b) Patients discontinuing first-line adalimumab who were switched to second-line etanercept or ustekinumab
